# Supplementary material
Source: ML conference proceedings conference paper supplement (https://proceedings.mlr.press/v97/cao19a.html)
Supplement: Supplementary file [file cao19a-supp.pdf]

# Dynamic Learning with Frequent New Product Launches: A Sequential Multinomial Logit Bandit Problem

## Supplementary Material

Junyu Cao    Wei Sun

**Proposition 4** *The optimal product offering  $\mathbf{S}^*$  to the optimization problem (3.1) in each tier is a profit-ordered set. In addition,  $\mathbf{S}^*$  is profit-ordered by tier.*

**Proof.** To show  $S_1^*$  is profit-ordered, we will first prove that for any  $i \in S_1^*$ ,  $r_i \geq E[R(\mathbf{S}^*)]$ . Suppose there exists  $i \in S_1^*$  and  $r_i < E[R(\mathbf{S}^*)]$ , it implies that,

$$\begin{aligned}
 r_i < E[R(\mathbf{S}^*)] &= \frac{\sum_{k \in S_1^* \setminus \{i\}} v_k r_k + r_i v_i + E[R(S_2^*)]}{1 + \sum_{k \in S_1^* \setminus \{i\}} v_k + v_i} \\
 \Leftrightarrow \left(1 + \sum_{k \in S_1^* \setminus \{i\}} v_k\right) r_i &< \sum_{k \in S_1^* \setminus \{i\}} v_k r_k + E[R(S_2^*)] \\
 \Leftrightarrow \left(1 + \sum_{k \in S_1^* \setminus \{i\}} v_k\right) r_i v_i + \left(\sum_{k \in S_1^* \setminus \{i\}} v_k r_k + E[R(S_2^*)]\right) &\left(1 + \sum_{k \in S_1^* \setminus \{i\}} v_k\right) \\
 < v_i \left(\sum_{k \in S_1^* \setminus \{i\}} v_k r_k + E[R(S_2^*)]\right) + \left(\sum_{k \in S_1^* \setminus \{i\}} v_k r_k + E[R(S_2^*)]\right) &\left(1 + \sum_{k \in S_1^* \setminus \{i\}} v_k\right) \\
 \Leftrightarrow \left(1 + \sum_{k \in S_1^* \setminus \{i\}} v_k\right) \left(r_i v_i + \sum_{k \in S_1^* \setminus \{i\}} v_k r_k + E[R(S_2^*)]\right) & \\
 < \left(1 + \sum_{k \in S_1^* \setminus \{i\}} v_k + v_i\right) \left(\sum_{k \in S_1^* \setminus \{i\}} v_k r_k + E[R(S_2^*)]\right) & \\
 \Leftrightarrow \frac{\sum_{k \in S_1^* \setminus \{i\}} v_k r_k + r_i v_i + E[R(S_2^*)]}{1 + \sum_{k \in S_1^* \setminus \{i\}} v_k + v_i} < \frac{\sum_{k \in S_1^* \setminus \{i\}} v_k r_k + E[R(S_2^*)]}{1 + \sum_{k \in S_1^* \setminus \{i\}} v_k}. &
 \end{aligned}$$

The last inequality suggests that removing  $i$  from  $S_1^*$  will improve the expected profit. It is a contradiction that  $\mathbf{S}^*$  is optimal. Similarly we can prove that for any  $i \notin S_1^*$ ,  $r_i \leq E[R(\mathbf{S}^*)]$ , otherwise adding  $i$  to  $S_1^*$  will improve the expected profit. The proof follows similarly for  $S_2^*$ .

To prove  $\mathbf{S}^*$  is profit-ordered by level, notice that the expected profit of the tiered assortment is at least as large as only offering  $S_2$  since  $\mathbf{S} = (\emptyset, S_2)$  is also a feasible solution. That is,  $E[R(S_2^*)] \leq E[R(\mathbf{S}^*)]$ . Therefore,  $r_i \leq E[R(S_2^*)] \leq E[R(\mathbf{S}^*)] \leq r_j$  for any  $i \notin S_2^*, j \in S_1^*$ . Thus, we reach the desired result. ■

**Proposition 5** *Denote the optimal recommendation before and after including a new product with profit  $r_m$  to a candidate set as  $\mathbf{S}^* = (S_1^*, S_2^*, \dots, S_W^*)$  and  $\hat{\mathbf{S}}^*$ , respectively. Define  $\mathbf{S}_j^* = (S_j^*, S_{j+1}^*, \dots, S_W^*)$ . The following properties holds.*

- a.)  $E[R(\hat{\mathbf{S}}_j^*)] \geq E[R(\hat{\mathbf{S}}_{j+1}^*)]$  for any  $j = 1, \dots, W - 1$ .
- b.) If  $E[R(\mathbf{S}_j^*)] < r_m < E[R(\mathbf{S}_{j-1}^*)]$  for some  $j$ , then  $m \in \hat{\mathbf{S}}^*$  but  $m \notin \hat{S}_1^* \cup \hat{S}_2^* \cup \dots \cup \hat{S}_{j-1}^*$ .
- c.) If  $r_m < E[R(\mathbf{S}_W^*)]$ , then  $m \notin \hat{\mathbf{S}}^*$ .

**Proof.** First note the relation between  $E[R(\hat{\mathbf{S}}_j^*)]$  and  $E[R(\hat{\mathbf{S}}_{j+1}^*)]$ , where

$$E[R(\hat{\mathbf{S}}_j^*)] = \frac{\sum_{i \in \hat{\mathbf{S}}_j^*} r_i v_i + E[R(\hat{\mathbf{S}}_{j+1}^*)]}{1 + \sum_{i \in \hat{\mathbf{S}}_j^*} v_i}.$$

Therefore, for any  $j$ , we have  $E[R(\hat{\mathbf{S}}_j^*)] \geq E[R(\hat{\mathbf{S}}_{j+1}^*)]$ , otherwise  $\mathbf{S} = (\hat{S}_1^*, \dots, \hat{S}_{j-1}^*, \emptyset, \hat{S}_{j+1}^*)$  would be a feasible solution whose expected profit is higher than  $E[R(\hat{\mathbf{S}}^*)]$ . It is a contradiction to the fact that  $\hat{\mathbf{S}}^*$  is optimal. This proves a).

Note that  $E[R(\hat{\mathbf{S}}_j^*)] \geq E[R(\mathbf{S}_j^*)]$  for any  $j$  since  $\hat{\mathbf{S}}_j^*$  comes from a larger candidate pool. Following the similar procedure in the proof for Proposition 4, if the new product  $m$  is included in tier  $k$  where  $k \leq j - 1$  but  $r_m < E[R(\mathbf{S}_{j-1}^*)] \leq E[R(\mathbf{S}_k^*)] \leq E[R(\hat{\mathbf{S}}_k^*)]$ , we prove b) and c) by contradiction. That is, removing product  $m$  in tier  $k$  will make the expected profit higher. It implies that  $m \notin \hat{S}_1^* \cup \hat{S}_2^* \cup \dots \cup \hat{S}_{j-1}^*$ . On the other hand, if  $m$  is not included in tier  $j, \dots, W$ , then we have  $E[R(\mathbf{S}_i^*)] = E[R(\hat{\mathbf{S}}_i^*)]$  for all  $i = j, \dots, W$ . Therefore if  $r_m > E[R(\mathbf{S}_j^*)] = E[R(\hat{\mathbf{S}}_j^*)] \geq \dots \geq E[R(\mathbf{S}_W^*)] = E[R(\hat{\mathbf{S}}_W^*)]$ , then adding  $m$  to any one of the tier  $j, \dots, W$  would increase the expected profit, which is also a contradiction to the fact that  $\hat{\mathbf{S}}^*$  is optimal. It concludes the proof for b) and c). ■

**Lemma 7**  $\hat{v}_{i,l}^{(k)}$  are i.i.d. geometric random variables with parameter  $\frac{1}{1+v_i}$  for any  $l$  and  $k = 1, 2$ . Therefore, they are unbiased i.i.d. estimators of  $v_i$ .

**Proof.** Lemma 7 can be derived directly from Lemma 12 which is stated and shown next. ■

**Lemma 12** The moment generating function of the estimator conditioned on  $S_1^l$  and  $S_2^l$ ,  $\hat{v}_{i,l}^{(k)}$ , is given by

$$E_\pi \left[ e^{\theta \hat{v}_{i,l}^{(k)}} \right] = \frac{1}{1 - v_i(e^\theta - 1)}$$

for all  $i \in S_k^l$ ,  $\theta \leq \log \frac{1+v_i}{v_i}$ , and  $k = 1, 2$ .

**Proof.** Let  $N_k^l$  denote the number of customers who enter tier  $k$  in epoch  $l \in \mathcal{L}_k$  before no purchase in  $S_k^l$  occurs. The probability of no purchase for  $S_k^l$  conditioned on entering tier  $k$  is

$$p_0(S_k^l) = \frac{1}{1 + \sum_{j \in S_k^l} v_j}.$$

Given any fixed value of  $N_k^l$ ,  $\hat{v}_{i,l}^{(k)}$  is a binomial random variable with  $N_k^l$  trials and the success probability (i.e., exiting without choosing any product from current tier) is given by

$$q_i^{(k)}(S_k^l) = P(\text{choose } i \text{ from } S_k^l | \text{choose at least one product})$$

$$= \frac{v_i}{1 + \sum_{j \in S_k^l} v_j} \bigg/ \left( 1 - \frac{1}{1 + \sum_{j \in S_k^l} v_j} \right) = \frac{v_i}{\sum_{j \in S_k^l} v_j}.$$

Since the moment generating function for a binomial random variable with parameters  $n, p$  is  $(pe^\theta + 1 - p)^n$ , we have

$$E_\pi \left[ e^{\theta \hat{v}_{i,l}} | N_k^l \right] = E_{N_k^l} \left[ (q_i^{(k)} e^\theta + 1 - q_i^{(k)})^{N_k^l} \right].$$

Therefore,

$$\begin{aligned} E_\pi \left[ e^{\theta \hat{v}_{i,l}} \right] &= E \left[ E_{N_k^l} \left[ (q_i^{(k)} e^\theta + 1 - q_i^{(k)})^{N_k^l} \right] \right] \\ &= \frac{p_0(S_k^l)}{1 - (q_i^{(k)} e^\theta + 1 - q_i^{(k)})(1 - p_0(S_k^l))} \\ &= \frac{1}{1 - v_i(e^\theta - 1)} \text{ for all } \theta < \log \frac{1 + v_i}{v_i}. \end{aligned}$$

■

**Lemma 8** Assume  $0 \leq v_i \leq v_i^{UCB}$  for all  $i = 1, \dots, K$ . Suppose  $\mathbf{S}^*$  is an optimal tiered recommendation when the parameters of SMNL model are given by  $\mathbf{v}$ . Then  $E[R(\mathbf{S}^*, \mathbf{v}^{UCB})] \geq E[R(\mathbf{S}^*, \mathbf{v})]$ .

**Proof.** For any product  $i \in S_2^*$ , we have  $r_i \geq E[R(S_2^*, \mathbf{v})]$  where

$$E[R(S_2^*, \mathbf{v})] = \frac{\sum_{j \in S_2^*} r_j v_j}{1 + \sum_{j \in S_2^*} v_j},$$

otherwise removing it from  $S_2^*$  will improve the expected profit. Let  $\Delta v_i = v_i^{UCB} - v_i$ , then we have

$$E[R(S_2^*, \mathbf{v}^{UCB})] = \frac{\sum_{j \in S_2^*} r_j v_j + \sum_{j \in S_2^*} r_j \Delta v_j}{1 + \sum_{j \in S_2^*} v_j + \sum_{j \in S_2^*} \Delta v_j}.$$

Since  $r_j \geq E[R(S_2^*, \mathbf{v})]$  for  $j \in S_2^*$ , we have

$$\sum_{j \in S_2^*} r_j \Delta v_j \geq \sum_{j \in S_2^*} \Delta v_j E[R(S_2^*, \mathbf{v})],$$

which implies that

$$\sum_{j \in S_2^*} r_j \Delta v_j \left( 1 + \sum_{j \in S_2^*} v_j \right) \geq \left( \sum_{j \in S_2^*} r_j v_j \right) \left( \sum_{j \in S_2^*} \Delta v_j \right).$$

Adding  $\left( 1 + \sum_{j \in S_2^*} v_j \right) \left( \sum_{j \in S_2^*} r_j v_j \right)$  to both sides,

$$\sum_{j \in S_2^*} r_j \Delta v_j \left( 1 + \sum_{j \in S_2^*} v_j \right) + \left( 1 + \sum_{j \in S_2^*} v_j \right) \left( \sum_{j \in S_2^*} r_j v_j \right)$$

$$\geq \left( \sum_{j \in S_2^*} r_j v_j \right) \left( \sum_{j \in S_2^*} \Delta v_j \right) + \left( 1 + \sum_{j \in S_2^*} v_j \right) \left( \sum_{j \in S_2^*} r_j v_j \right) = \left( \sum_{j \in S_2^*} r_j v_j \right) \left( 1 + \sum_{j \in S_2^*} v_j + \sum_{j \in S_2^*} \Delta v_j \right).$$

Therefore, we obtain the following

$$\left( \sum_{j \in S_2^*} r_j v_j + \sum_{j \in S_2^*} r_j \Delta v_j \right) \left( 1 + \sum_{j \in S_2^*} v_j \right) \geq \left( \sum_{j \in S_2^*} r_j v_j \right) \left( 1 + \sum_{j \in S_2^*} v_j + \sum_{j \in S_2^*} \Delta v_j \right).$$

It implies that

$$E[R(S_2^*, \mathbf{v}^{UCB})] = \frac{\sum_{j \in S_2^*} r_j v_j + \sum_{j \in S_2^*} r_j \Delta v_j}{1 + \sum_{j \in S_2^*} v_j + \sum_{j \in S_2^*} \Delta v_j} \geq \frac{\sum_{j \in S_2^*} r_j v_j}{1 + \sum_{j \in S_2^*} v_j} = E[R(S_2^*, \mathbf{v})].$$

Similarly we can prove that

$$\frac{\sum_{j \in S_1^*} r_j v_j + \sum_{j \in S_1^*} r_j \Delta v_j + E[R(S_2^*, \mathbf{v})]}{1 + \sum_{j \in S_1^*} v_j + \sum_{j \in S_1^*} \Delta v_j} \geq \frac{\sum_{j \in S_1^*} r_j v_j + E[R(S_2^*, \mathbf{v})]}{1 + \sum_{j \in S_1^*} v_j} = E[R(\mathbf{S}^*, \mathbf{v})]$$

for  $\Delta v_j > 0$ . Combining both results, we have

$$\begin{aligned} E[R(\mathbf{S}^*, \mathbf{v}^{UCB})] &= \frac{\sum_{j \in S_1^*} r_j v_j + \sum_{j \in S_1^*} r_j \Delta v_j + E[R(S_2^*, \mathbf{v}^{UCB})]}{1 + \sum_{j \in S_1^*} v_j + \sum_{j \in S_1^*} \Delta v_j} \\ &\geq \frac{\sum_{j \in S_1^*} r_j v_j + \sum_{j \in S_1^*} r_j \Delta v_j + E[R(S_2^*, \mathbf{v})]}{1 + \sum_{j \in S_1^*} v_j + \sum_{j \in S_1^*} \Delta v_j} \geq E[R(\mathbf{S}^*, \mathbf{v})]. \end{aligned}$$

■

The following lemma is a straightforward derivation from Corollary D.1 from Agrawal et al., 2017a.

**Lemma 13 (Concentration bound of geometric random variable)** For  $n$  i.i.d. geometric random variables  $X_1, \dots, X_n$  with parameter  $\frac{1}{1+v_i}$  with  $v_i \leq 1$ , we have

$$P \left( \left| \frac{1}{n} \sum_{i=1}^n X_i - v_i \right| > \sqrt{\frac{48 \log(\lambda + 1)}{n}} + \frac{48 \log(\lambda + 1)}{n} \right) \leq \frac{4}{\lambda^2}$$

for any  $\lambda > 0$  and all  $n \in \mathbb{N}^+$ .

**Lemma 9 (Minimum learning criterion)** For any  $\epsilon$  and  $\alpha > 0$ , if the number of epochs  $M \geq \frac{192 \log(2/\alpha+1)}{(-1+\sqrt{1+4\epsilon})^2}$ , then  $\bar{v}_i$  is within the  $\epsilon$ -confidence bound of  $v_i$  with probability at least  $1 - \alpha$ . That is,

$$P(|\bar{v}_{i,l} - v_i| > \epsilon) < 1 - \alpha$$

$$\text{if } T_i(l) > \frac{192 \log(2/\alpha+1)}{(-1+\sqrt{1+4\epsilon})^2}.$$

**Proof.** Set  $\lambda = 2/\alpha$ . Since  $f(t) = t^2 + t - \epsilon$  is negative on  $[\frac{-1-\sqrt{-1+4\epsilon}}{2}, \frac{-1+\sqrt{-1+4\epsilon}}{2}]$  and

$$0 < \sqrt{\frac{48 \log(\lambda + 1)}{M}} \leq \frac{-1 + \sqrt{-1 + 4\epsilon}}{2},$$

we have

$$\sqrt{\frac{48 \log(\lambda + 1)}{M}} + \frac{48 \log(\lambda + 1)}{M} \leq \epsilon.$$

Therefore, applying Lemma 13, we have

$$P(|\hat{v}_i - v_i| > \epsilon) \leq P\left(|\hat{v}_i - v_i| > \sqrt{\frac{48 \log(\lambda + 1)}{M}} + \frac{48 \log(\lambda + 1)}{M}\right) \leq \frac{4}{\lambda^2} = \alpha.$$

Therefore,

$$P(|\hat{v}_i - v_i| < \epsilon) \geq 1 - \alpha.$$

■

**Lemma 14** *The expected profits during one learning epoch, conditioned on  $\mathbf{S}'$ ,  $\mathbf{S}''$ , and  $\mathbf{v}$ , for the two strategies are*

$$E \left[ \sum_{t=1}^{N_1} R_t(\mathbf{S}') \right] = \sum_{j \in S_1} r_j v_j + r_m v_m + \frac{\sum_{j \in S_2} r_j v_j}{1 + \sum_{j \in S_2} v_j}$$

and

$$E \left[ \sum_{t=1}^{N_2} R_t(\mathbf{S}'') \right] = \left( 1 + \sum_{j \in S_2} v_j + v_m \right) \sum_{j \in S_1} r_j v_j + \sum_{j \in S_2} r_j v_j + r_m v_m.$$

**Proof.** Conditioned on  $N_1$ , the probability of choosing product  $j \in S'_1$  at the time before  $N_1$  is

$$\frac{v_j}{1 + \sum_{i \in S'_1} v_i} \Big/ \left( 1 - \frac{1}{1 + \sum_{i \in S'_1} v_i} \right),$$

and the expected profit to obtain at time  $N_1$  is  $\frac{\sum_{j \in S_2} r_j v_j}{1 + \sum_{j \in S_2} v_j}$ . Thus the expected profit obtained during the process of getting one sample is

$$\begin{aligned} E \left[ \sum_{t=1}^{N_1} R_t(\mathbf{S}') \right] &= E \left[ E \left[ \sum_{t=1}^{N_1} R_t(\mathbf{S}') \mid N_1 \right] \right] \\ &= E \left[ \sum_{i=1}^{N_1-1} \frac{1}{1 + \sum_{j \in S_1} v_j + v_m} \left( \sum_{j \in S_1} r_j v_j + r_m v_m \right) \Big/ \left( 1 - \frac{1}{1 + \sum_{j \in S_1} v_j + v_m} \right) \right] + \frac{\sum_{j \in S_2} r_j v_j}{1 + \sum_{j \in S_2} v_j} \\ &= E \left[ \sum_{i=1}^{N_1-1} \frac{1}{\sum_{j \in S_1} v_j + v_m} \left( \sum_{j \in S_1} r_j v_j + r_m v_m \right) \right] + \frac{\sum_{j \in S_2} r_j v_j}{1 + \sum_{j \in S_2} v_j} \end{aligned}$$

$$= \sum_{j \in S_1} r_j v_j + r_m v_m + \frac{\sum_{j \in S_2} r_j v_j}{1 + \sum_{j \in S_2} v_j},$$

where the last equality follows from the fact that  $N_1$  is a geometric random variable with mean  $1 + \sum_{j \in S_1} v_j + v_m$  so  $E[N_1 - 1] = \sum_{j \in S_1} v_j + v_m$ . Alternatively, since  $N_1$  is a stopping time, the above result can be computed through Wald's equation

$$E \left[ \sum_{t=1}^{N_1} R_t(\mathbf{S}') \right] = E[N_1] E[R(\mathbf{S}')] = \sum_{j \in S_1} r_j v_j + r_m v_m + \frac{\sum_{j \in S_2} r_j v_j}{1 + \sum_{j \in S_2} v_j}.$$

If we add the new product to  $S_2$ . Then the expected profit gained during the process of one sample obtained is

$$\begin{aligned} E \left[ \sum_{t=1}^{N_2} R_t(\mathbf{S}'') \right] &= E \left[ E \left[ \sum_{t=1}^{N_2-1} R_t(\mathbf{S}'') \mid N_2 \right] \right] \\ &= E \left[ \sum_{t=1}^{N_2-1} \frac{1}{1 + \sum_{j \in S_1} v_j} \left( \sum_{j \in S_1} r_j v_j + \frac{\sum_{j \in S_2} r_j v_j + r_m v_m}{1 + \sum_{j \in S_2} v_j + v_m} \right) \right. \\ &\quad \left. \left( 1 - \frac{1}{(1 + \sum_{j \in S_1} v_j)(1 + \sum_{j \in S_2} v_j + v_m)} \right) \right] \\ &= \left( 1 + \sum_{j \in S_2} v_j + v_m \right) \left( \sum_{j \in S_1} r_j v_j + \frac{\sum_{j \in S_2} r_j v_j + r_m v_m}{1 + \sum_{j \in S_2} v_j + v_m} \right) \\ &= \left( 1 + \sum_{j \in S_2} v_j + v_m \right) \sum_{j \in S_1} r_j v_j + \sum_{j \in S_2} r_j v_j + r_m v_m, \end{aligned}$$

where the second last equality follows from the fact that  $N_2$  is a geometric random variable with mean  $(1 + \sum_{j \in S_1} v_j)(1 + \sum_{j \in S_2} v_j + v_m)$ . ■

**Theorem 10** *The optimal solution to  $G^{(1)}$  and  $G^{(2)}$  is the same as  $\mathbf{S}^*$ . That is,*

$$\mathbf{Q}^* = \mathbf{Q}'^* = \mathbf{S}^*.$$

*In addition, we have*

$$G^{(1)}(\mathbf{S}^*, \mathbf{v}) \geq G^{(2)}(\mathbf{S}^*, \mathbf{v}) = v_m(E[R(S_2^*)] - r_m).$$

**Proof.** Let  $\mathbf{Q}^*$  and  $\mathbf{Q}'^*$  denote the optimal tiered recommendation solution that minimizes the regret  $G^{(1)}$  and  $G^{(2)}$ , respectively. Note that

$$G^{(1)}(\mathbf{Q}, \mathbf{v}) = E[R(\mathbf{S}^*)] \left( 1 + \sum_{j \in Q_1} v_j + v_m \right) - \left( \sum_{j \in Q_1} r_j v_j + r_m v_m + \frac{\sum_{j \in Q_2} r_j v_j}{1 + \sum_{j \in Q_2} v_j} \right).$$

Let  $\mathbf{Q}^*$  denote the optimal solution. The optimal recommendation  $\mathbf{Q}^* = (Q_1^*, Q_2^*)$  satisfies

$$Q_1^* = \operatorname{argmin}_{Q_1} \sum_{j \in Q_1} v_j (E[R(\mathbf{S}^*)] - r_j),$$

and

$$Q_2^* = \operatorname{argmin}_{Q_2} - \frac{\sum_{j \in Q_2} r_j v_j}{1 + \sum_{j \in Q_2} v_j}.$$

From the above equation,  $j \in Q_1^*$  if and only if  $r_j > E[R(\mathbf{S}^*)]$ . As is shown in Proposition 4, it implies that  $Q_1^* = S_1^*$ . The second equality implies that  $Q_2^* = S_2^*$  so  $\mathbf{Q}^* = \mathbf{S}^*$ .

Note that

$$\begin{aligned} G^{(2)}(\mathbf{Q}', \mathbf{v}) &= E[R(\mathbf{S}^*)] \left( 1 + \sum_{j \in Q'_1} v_j \right) \left( 1 + \sum_{j \in Q'_2} v_j + v_m \right) \\ &\quad - \left( 1 + \sum_{j \in Q'_2} v_j + v_m \right) \sum_{j \in Q'_1} r_j v_j - \sum_{j \in Q'_2} r_j v_j - r_m v_m. \end{aligned}$$

Minimizing  $G^{(2)}(\mathbf{Q}', \mathbf{v})$  is equivalent to solving the optimization problem

$$\max_{\mathbf{Q}'} \left( 1 + \sum_{j \in Q'_2} v_j \right) \left( 1 + \sum_{j \in Q'_1} v_j \right) (E[R(\mathbf{Q}')] - E[R(\mathbf{S}^*)]) + v_m \left( 1 + \sum_{j \in Q'_1} v_j \right) (E[R(Q'_1)] - E[R(\mathbf{S}^*)]). \quad (1)$$

For any fixed set  $Q'_2$ , to find the optimal  $Q'_1$ , note that

$$\begin{aligned} Eq (1) &= \left( 1 + \sum_{j \in Q'_2} v_j \right) \left( \sum_{j \in Q'_1} r_j v_j + E[R(Q'_2)] \right) + v_m \left( \sum_{j \in Q'_1} r_j v_j + E[R(Q'_2)] \right) \\ &\quad - \left( 1 + \sum_{j \in Q'_2} v_j + v_m \right) \left( 1 + \sum_{j \in Q'_1} v_j \right) E[R(\mathbf{S}^*)] \\ &= \left( 1 + \sum_{j \in Q'_2} v_j + v_m \right) \sum_{j \in Q'_1} r_j v_j - E[R(\mathbf{S}^*)] \left( 1 + \sum_{j \in Q'_2} v_j + v_m \right) \left( \sum_{j \in Q'_1} v_j \right) \\ &\quad + (E[R(Q'_2)] - E[R(\mathbf{S}^*)]) \left( 1 + \sum_{j \in Q'_2} v_j + v_m \right). \end{aligned}$$

Therefore

$$Q_1'^* = \max_{Q'_1} \left( 1 + \sum_{j \in Q'_2} v_j + v_m \right) \sum_{j \in Q'_1} r_j v_j - E[R(\mathbf{S}^*)] \left( 1 + \sum_{j \in Q'_2} v_j + v_m \right) \left( \sum_{j \in Q'_1} v_j \right)$$

$$= \max_{Q'_1} \sum_{j \in Q'_1} r_j v_j - E[R(\mathbf{S}^*)] \left( \sum_{j \in Q'_1} v_j \right).$$

It implies that  $j \in Q'_1$  if and only if  $r_j \geq E[R(\mathbf{S}^*)]$ . For any  $i \in S_1^*$ , we have  $r_i \geq E[R(\mathbf{S}^*)]$ , which implies that  $S_1^* \subset Q'_1$ . Also, for any product that  $r_i \geq E[R(\mathbf{S}^*)]$  and  $i \in X_1$ , it is included in  $Q'_1$ . It implies that the optimal  $Q'_1$  is  $S_1^*$ . For the fixed set  $S_1^*$ , we find the optimal  $Q'_2$ . Note that the second term in Eq 1 is not dependent on  $Q'_2$ , and the first term with  $Q'_1 = S_1^*$  equals

$$\begin{aligned} & \left( 1 + \sum_{j \in Q'_2} v_j \right) \left( 1 + \sum_{j \in S_1^*} v_j \right) (E[R((S_1^*, Q'_2))] - E[R(\mathbf{S}^*)]) \\ &= \left( 1 + \sum_{j \in Q'_2} v_j \right) \left( \sum_{j \in S_1^*} r_j v_j \right) + \sum_{j \in Q'_2} r_j v_j - \left( 1 + \sum_{j \in Q'_2} v_j \right) \left( 1 + \sum_{j \in S_1^*} v_j \right) E[R(\mathbf{S}^*)] \\ &= \left( \sum_{j \in S_1^*} r_j v_j - \left( 1 + \sum_{j \in S_1^*} v_j \right) E[R(\mathbf{S}^*)] \right) \left( \sum_{j \in Q'_2} v_j \right) + \sum_{j \in Q'_2} r_j v_j \\ & \quad + \sum_{j \in S_1^*} r_j v_j - \left( 1 + \sum_{j \in S_1^*} v_j \right) E[R(\mathbf{S}^*)]. \end{aligned}$$

For the optimal  $Q'_2$ ,

$$\begin{aligned} Q'_2 &= \operatorname{argmax}_{Q'_2} \left( \sum_{j \in S_1^*} r_j v_j - \left( 1 + \sum_{j \in S_1^*} v_j \right) E[R(\mathbf{S}^*)] \right) \left( \sum_{j \in Q'_2} v_j \right) + \sum_{j \in Q'_2} r_j v_j \\ &= \operatorname{argmax}_{Q'_2} \left( 1 + \sum_{j \in S_1^*} v_j \right) (E[R(S_1^*)] - E[R(\mathbf{S}^*)]) \left( \sum_{j \in Q'_2} v_j \right) + \sum_{j \in Q'_2} r_j v_j. \end{aligned}$$

Therefore  $j \in Q'_2$  if and only if

$$r_j > \left( 1 + \sum_{j \in S_1^*} v_j \right) (E[R(\mathbf{S}^*)] - E[R(S_1^*)]) = E[R(S_2^*)].$$

It implies that  $Q'_2 = S_2^*$  so  $\mathbf{Q}'^* = \mathbf{S}^*$ .

For  $G^{(1)}(\mathbf{S}^*, \mathbf{v})$ , we have

$$\begin{aligned} G^{(1)}(\mathbf{S}^*, \mathbf{v}) &= E[R(\mathbf{S}^*)] \left( 1 + \sum_{j \in S_1^*} v_j + v_m \right) - \left( \sum_{j \in S_1^*} r_j v_j + r_m v_m + \frac{\sum_{j \in S_2^*} r_j v_j}{1 + \sum_{j \in S_2^*} v_j} \right) \\ &= E[R(\mathbf{S}^*)] \left( 1 + \sum_{j \in S_1^*} v_j \right) - \left( \sum_{j \in S_1^*} r_j v_j + \frac{\sum_{j \in S_2^*} r_j v_j}{1 + \sum_{j \in S_2^*} v_j} \right) + E[R(\mathbf{S}^*)] v_m - v_m r_m \end{aligned}$$



$$= v_m(E[R(\mathbf{S}^*)] - r_m).$$

Similarly, we have

$$\begin{aligned} G^{(2)}(\mathbf{S}^*, \mathbf{v}) &= E[R(\mathbf{S}^*)] \left(1 + \sum_{j \in S_1^*} v_j\right) \left(1 + \sum_{j \in S_2^*} v_j + v_m\right) \\ &\quad - \left(1 + \sum_{j \in S_2^*} v_j + v_m\right) \sum_{j \in S_1^*} r_j v_j - \sum_{j \in S_2^*} r_j v_j - r_m v_m \\ &= \left(1 + \sum_{j \in S_2^*} v_j\right) \left(E[R(\mathbf{S}^*)] \left(1 + \sum_{j \in S_1^*} v_j\right) - \sum_{j \in S_1^*} r_j v_j - \frac{\sum_{j \in S_2^*} r_j v_j}{1 + \sum_{j \in S_2^*} v_j}\right) \\ &\quad + v_m \left(1 + \sum_{j \in S_1^*} v_j\right) \left(E[R(\mathbf{S}^*)] - \frac{\sum_{j \in S_1^*} r_j v_j}{1 + \sum_{j \in S_1^*} v_j}\right) - r_m v_m \\ &= v_m(E[R(S_2^*)] - r_m). \end{aligned}$$

Since  $E[R(\mathbf{S}^*)] \geq E[R(S_2^*)]$  as shown in Proposition 4, we have  $G^{(1)}(\mathbf{S}^*, \mathbf{v}) \geq G^{(2)}(\mathbf{S}^*, \mathbf{v})$ . ■

Lemma 15 provides the concentration bound of  $v_{i,l}^{UCB}$ , which is a straightforward conclusion from Lemma 4.1 from Agrawal et al., 2017a.

**Lemma 15 (Concentration bound)** *For every  $l \in \mathcal{L}$ , we have*

a.)  $v_{i,l}^{UCB} \geq v_i$  with probability at least  $1 - \frac{6}{K^{2l}}$  for all  $i = 1, \dots, K$ .

b.) There exists constants  $C_1$  and  $C_2$  such that  $v_{i,l}^{UCB} - \bar{v}_{i,l} \leq C_1 \sqrt{\frac{v_i \log(Kl+1)}{T_i(l)}} + C_2 \frac{\log(Kl+1)}{T_i(l)}$ . with probability at least  $1 - \frac{7}{K^{2l}}$ .

**Theorem 11 (Performance bound for Algorithm 1)** *The regret during time  $[0, T]$  is bounded above by*

$$\begin{aligned} \text{Reg}_\pi(T; \mathbf{v}) &\leq CK \log^2(KT) + C\sqrt{TK \log(KT)} \\ &\quad + M \sum_{i \in X} v_i (r_{\max} - r_i), \end{aligned}$$

for some constant  $C$  where  $r_{\max}$  is the highest profit among  $X$ , and  $K$  is the total number of products.

**Proof.** Since products are being dynamically launched, the optimal recommendation is changing. Let  $\mathbf{S}_l^*$  ( $\tilde{\mathbf{S}}^l$ ) be the optimal recommendation among sets  $(X_1^l, X_2^l)$  with value  $\mathbf{v}$  ( $\mathbf{v}_l^{UCB}$ ). The new product is defined as the product whose learning epoch is less than  $M$ . Define  $H_l$  as the set of new products that are not in  $\tilde{S}_2^l$  but are added to the second-tier recommendation at epoch  $l$  for  $l \in \mathcal{L}_2$ .

Also define the function  $\kappa(l)$  as a set of epochs on tier 1 which corresponds to epoch  $l \in \mathcal{L}_2$ . (In the example of Fig 1,  $\kappa(0) = \{0, 1\}$ ,  $\kappa(3) = \{3, 4\}$ .) The summation of the regret until time  $T$  is

$$Reg_\pi(T; \mathbf{v}) = E_\pi \left\{ \sum_{l \in \mathcal{L}_2} \sum_{j \in \kappa(l)} \sum_{t \in \varepsilon_j^1} \left( R_t(\mathbf{S}_j^*, \mathbf{v}) - R_t(\tilde{S}_1^j, \tilde{S}_2^l \cup H_l, \mathbf{v}) \right) \right\},$$

where  $R_t$  denotes the profit obtained at time  $t$ . Define  $\mathcal{F}_l$  as the filtration associated with the policy up to epoch  $l$ . Since

$$\begin{aligned} & E_\pi \left\{ \sum_{l \in \mathcal{L}_2} \sum_{j \in \kappa(l)} \sum_{t \in \varepsilon_j^1} R_t(\tilde{S}_1^j, (\tilde{S}_2^l \cup H_l), \mathbf{v}) \right\} \\ &= E_\pi \left\{ \sum_{l \in \mathcal{L}_2} \sum_{j \in \kappa(l)} \sum_{t \in \varepsilon_j^1} R_t(\tilde{S}_1^j, \mathbf{v}) + \sum_{l \in \mathcal{L}_2} \sum_{t \in \varepsilon_j^2} R_t(\tilde{S}_2^l \cup H_l, \mathbf{v}) \right\}, \end{aligned}$$

we have

$$Reg_\pi(T; \mathbf{v}) = E_\pi \left\{ \sum_{l \in \mathcal{L}_2} \left( \left( \sum_{j \in \kappa(l)} \sum_{t \in \varepsilon_j^1} R_t(\mathbf{S}_j^*, \mathbf{v}) - R_t(\tilde{S}_1^j, \mathbf{v}) \right) - \sum_{t \in \varepsilon_j^2} R_t(\tilde{S}_2^l \cup H_l, \mathbf{v}) \right) \right\}.$$

For all  $l = 1, \dots, |\mathcal{L}|$ , define the event  $A_l$  as

$$A_l = \bigcap_{i=1}^K \left\{ v_{i,l}^{UCB} - C_1 \sqrt{\frac{v_i \log(K(l - l_{i,0}) + 1)}{T_i(l)}} + C_2 \frac{\log(K(l - l_{i,0}) + 1)}{T_i(l)} < v_i < v_{i,l}^{UCB} \right\}.$$

For products not launched before epoch  $l$ , we assume they directly fall into this confidence bound in epoch  $l$ . Conditional on  $A_j A_l$  for  $j \in \mathcal{L}_1$  and  $l \in \mathcal{L}_2$ , according to Lemma 8, we have

$$E[R(\tilde{\mathbf{S}}^l, \mathbf{v})] \leq E[R(\mathbf{S}^*, \mathbf{v})] \leq E[R(\mathbf{S}^*, \mathbf{v}_l^{UCB})] \leq E[R(\tilde{\mathbf{S}}^l, \mathbf{v}_l^{UCB})],$$

so  $E[R(\mathbf{S}^*, \mathbf{v})] - E[R(\tilde{\mathbf{S}}^l, \mathbf{v})]$  can be bounded from above by  $E_\pi[R(\tilde{\mathbf{S}}_j, \mathbf{v}_j^{UCB} \oplus \mathbf{v}_l^{UCB})] - E_\pi[R(\mathbf{S}_j^*, \mathbf{v})]$  where  $\mathbf{v}_j^{UCB} \oplus \mathbf{v}_l^{UCB}$  denotes using  $\mathbf{v}_j^{UCB}$  and  $\mathbf{v}_l^{UCB}$  to calculate the first- and second-tier recommendation, respectively. Then we have for a given  $l \in \mathcal{L}_2$ ,

$$\begin{aligned} & E_\pi \left\{ \left( \left( \sum_{j \in \kappa(l)} \sum_{t \in \varepsilon_j^1} R_t(\mathbf{S}_j^*, \mathbf{v}) - R_t(\tilde{S}_1^j, \mathbf{v}) \right) - \sum_{t \in \varepsilon_j^2} R_t(\tilde{S}_2^l \cup H_l, \mathbf{v}) \right) 1(A_l) \right\} \\ & \leq E_\pi \left\{ \sum_{j \in \kappa(l)} \left( \sum_{t \in \varepsilon_j^1} R_t(\mathbf{S}_j^*, \mathbf{v}) - R_t(\tilde{S}_1^j, \mathbf{v}) \right) 1(A_j A_l) - \sum_{t \in \varepsilon_j^2} R_t(\tilde{S}_2^l \cup H_l, \mathbf{v}) 1(A_l) + \sum_{j \in \kappa(l)} 1(A_j^c) \sum_{t \in \varepsilon_j^1} r_{max} \right\} \\ & \leq E_\pi \left\{ \sum_{j \in \kappa(l)} \left( \sum_{t \in \varepsilon_j^1} R_t(\tilde{\mathbf{S}}^j, \mathbf{v}_j^{UCB} \oplus \mathbf{v}_l^{UCB}) - R_t(\tilde{S}_1^j, \mathbf{v}) \right) 1(A_j A_l) \right\} \end{aligned}$$

$$\begin{aligned}
& - \sum_{t \in \varepsilon_t^2} R_t(\tilde{S}_2^l \cup H_l, \mathbf{v}) 1(A_l) + \sum_{j \in \kappa(l)} 1(A_j^c) E_\pi \left[ \sum_{t \in \varepsilon_j^1} r_{max} | \mathcal{F}_{j-1} \right] \Bigg\} \\
\leq & E_\pi \left\{ \sum_{j \in \kappa(l)} 1(A_j A_l) E \left[ \sum_{t \in \varepsilon_j^1} R_t(\tilde{\mathbf{S}}^j, \mathbf{v}_j^{UCB} \oplus \mathbf{v}_l^{UCB}) - R_t(\tilde{S}_1^j, \mathbf{v}) \middle| \mathcal{F}_{j-1} \right] \right. \\
& \left. - \sum_{t \in \varepsilon_t^2} R_t(\tilde{S}_2^l \cup H_l, \mathbf{v}) 1(A_l) + r_{max}(1+K) \sum_{j \in \kappa(l)} 1(A_j^c) \right\},
\end{aligned}$$

where  $r_{max}$  is the maximum profit among all products in  $X$ . Since on the event  $A_j A_l$ , we have

$$\begin{aligned}
& E \left[ \sum_{t \in \varepsilon_j^1} R_t(\tilde{\mathbf{S}}^j, \mathbf{v}_j^{UCB} \oplus \mathbf{v}_l^{UCB}) - R_t(\tilde{S}_1^j, \mathbf{v}) \middle| \mathcal{F}_{j-1} \right] \\
& = \left( 1 + \sum_{i \in \tilde{S}_1^j} v_i \right) \frac{\sum_{i \in \tilde{S}_1^j} r_i v_{i,j}^{UCB} + \frac{\sum_{i \in \tilde{S}_2} r_i v_{i,l}^{UCB}}{1 + \sum_{i \in \tilde{S}_2} v_{i,l}^{UCB}}}{1 + \sum_{i \in \tilde{S}_1^j} v_{i,j}^{UCB}} - \sum_{i \in \tilde{S}_1^j} r_i v_i \\
& \leq \sum_{i \in \tilde{S}_1^j} r_i (v_{i,j}^{UCB} - v_i) + E[R(\tilde{S}_2^l, \mathbf{v}_l^{UCB}) | \mathcal{F}_{l-1}],
\end{aligned}$$

where the first equality uses Wald's equation and the fact that  $|\varepsilon_j^1|$  follows the geometric distribution with mean  $(1 + \sum_{i \in \tilde{S}_1^j} v_i)$ . Therefore, we have

$$\begin{aligned}
Reg_\pi(T; \mathbf{v}) & \leq E_\pi \left\{ \sum_{l \in \mathcal{L}_2} \sum_{j \in \kappa(l)} \sum_{i \in \tilde{S}_1^j} r_i (v_{i,j}^{UCB} - v_i) 1(A_j) \right. \\
& \quad + \sum_{l \in \mathcal{L}_2} \sum_{t \in \varepsilon_t^2} \left( E[R_t(\tilde{S}_2^l, \mathbf{v}_l^{UCB}) | \mathcal{F}_{l-1}] - R_t(\tilde{S}_2^l \cup H_l, \mathbf{v}) \right) 1(A_l) \\
& \quad \left. + r_{max}(1+K) \sum_{l \in \mathcal{L}_2} \sum_{j \in \kappa(l)} 1(A_j^c) + r_{max} \sum_{l \in \mathcal{L}_2} \sum_{j \in \kappa(l)} \sum_{t \in \varepsilon_t^1} 1(A_l^c) \right\} \\
& \leq E_\pi \left\{ \sum_{l \in \mathcal{L}_2} \sum_{j \in \kappa(l)} \sum_{i \in \tilde{S}_1^j} r_i (v_{i,j}^{UCB} - v_i) 1(A_j) \right. \\
& \quad + \sum_{l \in \mathcal{L}_2} \sum_{t \in \varepsilon_t^2} \left( E[R_t(\tilde{S}_2^l, \mathbf{v}_l^{UCB}) | \mathcal{F}_{l-1}] - R_t(\tilde{S}_2^l \cup H_l, \mathbf{v}) \right) 1(A_l) \\
& \quad \left. + r_{max}(1+K) \sum_{j \in \mathcal{L}_1} 1(A_j^c) + r_{max}(1+K)^2 \sum_{l \in \mathcal{L}_2} 1(A_l^c) \right\}.
\end{aligned}$$

Since

$$\begin{aligned}
& E_\pi \left\{ \sum_{l \in \mathcal{L}_2} \sum_{t \in \varepsilon_l^2} \left( E[R_t(\tilde{S}_2^l, \mathbf{v}_l^{UCB}) | \mathcal{F}_{l-1}] - R_t(\tilde{S}_2^l \cup H_l, \mathbf{v}) \right) 1(A_l) \right\} \\
&= E_\pi \left\{ \sum_{l \in \mathcal{L}_2} 1(A_l) E \left[ \sum_{t \in \varepsilon_l^2} \left( R_t(\tilde{S}_2^l, \mathbf{v}_l^{UCB}) - R_t(\tilde{S}_2^l \cup H_l, \mathbf{v}) \right) \middle| \mathcal{F}_{l-1} \right] \right\} \\
&\leq E_\pi \left\{ \sum_{l \in \mathcal{L}_2} \left( 1 + \sum_{i \in \tilde{S}_2^l} v_i + \sum_{i \in H_l} v_i \right) \left( E[R(\tilde{S}_2^l, \mathbf{v}_l^{UCB}) - R(\tilde{S}_2^l \cup H_l, \mathbf{v}) | \mathcal{F}_{l-1}] \right) 1(A_l) \right\} \\
&= E_\pi \left\{ \sum_{l \in \mathcal{L}_2} \left( \sum_{i \in \tilde{S}_2^l} r_i(v_{i,l}^{UCB} - v_i) + \sum_{i \in H_l} v_i(E[R(\tilde{S}_2^l, \mathbf{v}_l^{UCB})] - r_i) \right) 1(A_l) \right\} \\
&= E_\pi \left[ \sum_{l \in \mathcal{L}_2} \sum_{i \in \tilde{S}_2^l} r_i(v_{i,l}^{UCB} - v_i) 1(A_l) \right] + E_\pi \left[ \sum_{l \in \mathcal{L}_2} \sum_{i \in H_l} v_i(E[R(\tilde{S}_2^l, \mathbf{v}_l^{UCB})] - r_i) 1(A_l) \right],
\end{aligned}$$

and

$$E_\pi \left[ \sum_{l \in \mathcal{L}_2} \sum_{i \in H_l} v_i(E[R(\tilde{S}_2^l, \mathbf{v}_l^{UCB})] - r_i) 1(A_l) \right] \leq M \sum_{i \in X} v_i(r_{max} - r_i).$$

The above inequality holds since any product will be included in  $H$  for at most  $M$  times. Thus, we have

$$Reg_\pi(T; \mathbf{v}) \leq E_\pi \left[ \Delta R + r_{max}(1+K) \sum_{l \in \mathcal{L}_1} 1(A_l^c) + r_{max}(1+K)^2 \sum_{l \in \mathcal{L}_2} 1(A_l^c) \right] + M \sum_{i \in X} v_i(r_{max} - r_i),$$

where

$$\Delta R = \sum_{l \in \mathcal{L}_1} \sum_{i \in \tilde{S}_1^l} r_i(v_{i,l}^{UCB} - v_i) 1(A_l) + \sum_{l \in \mathcal{L}_2} \sum_{i \in \tilde{S}_2^l} r_i(v_{i,l}^{UCB} - v_i) 1(A_l).$$

According to Lemma 15, we have

$$P(A_l^c) \leq \sum_{i \in X} \frac{13}{K^2(l - l_{i,0})} 1(l > l_{i,0}),$$

which implies that

$$\begin{aligned}
& E_\pi \left[ (1+K) \sum_{l \in \mathcal{L}_1} 1(A_l^c) + (1+K)^2 \sum_{l \in \mathcal{L}_2} 1(A_l^c) \right] \\
&\leq E_\pi \left[ (1+K) \sum_{l \in \mathcal{L}_1} \sum_{i \in X} \frac{13}{K^2(l - l_{i,0})} 1(l > l_{i,0}) + (1+K)^2 \sum_{l \in \mathcal{L}_2} \sum_{i \in X} \frac{13}{K^2(l - l_{i,0})} 1(l > l_{i,0}) \right]
\end{aligned}$$

$$\leq \left( \frac{1+K}{K^2} + \frac{(1+K)^2}{K^2} \right) \sum_{t=1}^{2T} K \frac{13}{t} \leq C_3 K \log(T)$$

for some constant  $C_3$ . Since

$$\begin{aligned} \Delta R &\leq \sum_{l \in \mathcal{L}_2} \sum_{i \in \tilde{S}_2^l} \left( C_1 \sqrt{\frac{v_i \log(K(l-l_{i,0})+1)}{T_i(l)}} + C_2 \frac{\log(K(l-l_{i,0})+1)}{T_i(l)} \right) \\ &\quad + \sum_{l \in \mathcal{L}_1} \sum_{i \in \tilde{S}_1^l} \left( C_1 \sqrt{\frac{v_i \log(K(l-l_{i,0})+1)}{T_i(l)}} + C_2 \frac{\log(K(l-l_{i,0})+1)}{T_i(l)} \right) \\ &\leq 2 \sum_{i=1}^K \sum_{t=1}^{T_i} \left( C_1 \sqrt{\frac{v_i \log(KT+1)}{t}} + C_2 \frac{\log(KT+1)}{t} \right), \end{aligned}$$

where  $T_i$  is total number of epochs for product  $i$  at time  $T$ , we have

$$\begin{aligned} \text{Reg}_\pi(T; \mathbf{v}) &\leq 2E_\pi \left[ \sum_{i=1}^K \sum_{t=1}^{T_i} \left( C_1 \sqrt{\frac{v_i \log(KT+1)}{t}} + C_2 \frac{\log(KT+1)}{t} \right) \right] \\ &\quad + r_{\max} E_\pi \left[ (1+K) \sum_{l \in \mathcal{L}_1} 1(A_l^c) + (1+K)^2 \sum_{l \in \mathcal{L}_2} 1(A_l^c) \right] + M \sum_{i \in X} v_i (r_{\max} - r_i) \\ &\leq C_4 K \log^2(KT) + C_4 \sum_{i=1}^K E_\pi \left[ \sqrt{v_i T_i \log(KT)} \right] + C_4 K \log T + M \sum_{i \in X} v_i (r_{\max} - r_i) \\ &\leq C_4 K \log^2(KT) + C_4 \sum_{i=1}^K \sqrt{v_i E_\pi[T_i] \log(KT)} + C_4 K \log T + M \sum_{i \in X} v_i (r_{\max} - r_i). \end{aligned}$$

Since

$$E_\pi \left[ \sum_{l \in \mathcal{L}_1} |\varepsilon_l^1| + \sum_{l \in \mathcal{L}_2} |\varepsilon_l^2| \right] \leq 4T,$$

and

$$\begin{aligned} E_\pi \left[ \sum_{k=1}^2 \sum_{l \in \mathcal{L}_k} |\varepsilon_l^k| \right] &= E_\pi \left[ \sum_{k=1}^2 \sum_{l \in \mathcal{L}_k} E \left[ |\varepsilon_l^k| \mid \mathcal{F} \right] \right] \\ &\geq E_\pi \left[ \sum_{k=1}^2 \sum_{l \in \mathcal{L}_k} \left( 1 + \sum_{i \in S_k^l} v_i \right) \right] \geq \sum_{i=1}^K E_\pi[T_i] v_i, \end{aligned}$$

where  $\mathcal{F}$  is the filtration corresponding to the recommendation offered in each epoch. To obtain the worst-case bound, we have

$$\max \sum_{i=1}^K \sqrt{v_i E[T_i] \log(KT)}$$

$$s.t. \quad \sum_{i=1}^K E[T_i] v_i \leq 4T.$$

The maximum possible objective value is  $2\sqrt{TK \log(KT)}$ . Therefore we conclude that

$$Reg_\pi(T; \mathbf{v}) \leq CK \log^2(KT) + C\sqrt{TK \log(KT)} + M \sum_{i \in X} v_i (r_{max} - r_i)$$

for some constant  $C$ . ■

**Remark:** The regret bound can be extended to multiple tiers. Similar to the proof for Theorem 11, define the function  $\kappa_r(l)$  as a set of epochs on tier  $r$  which corresponds to epoch  $l \in \mathcal{L}_{r+1}$ . Then the summation of the regret until time  $T$  is

$$Reg_\pi(T; \mathbf{v}) = E_\pi \left\{ \sum_{l_W \in \mathcal{L}_W} \sum_{l_{W-1} \in \kappa_{W-1}(l_W)} \cdots \sum_{l_1 \in \kappa_1(l_2)} \sum_{t \in \varepsilon_{l_1}^1} \left( R_t(\mathbf{S}_j^*, \mathbf{v}) - R_t(\tilde{S}_1^{l_1}, \tilde{S}_2^{l_2}, \dots, \tilde{S}_W^{l_W} \cup H_{l_W}, \mathbf{v}) \right) \right\},$$

and the remaining analysis follows similarly.
